# Supplementary material for: Unveiling the synergistic effect of A-site doping in perovskite nanosheets and electrode modulation for boosting dielectric performance of printed microcapacitors
Source: Royal Society of Chemistry journal article supplement (doi:10.1039/d4tc02191f), 2024-01-01
Supplement: d4tc02191f1.pdf [file d4tc02191f1.pdf]

Electronic supplementary information

**Unveiling the Synergistic Effect of A-Site Doping in Perovskite Nanosheets and Electrode Modulation for Boosting Dielectric Performance of Printed Microcapacitors**

Pengxiang Zhang <sup>a</sup>, Binbin Zhang <sup>a</sup>, Feng Dang <sup>c</sup>, Ce-Wen Nan <sup>d</sup>, and Bao-Wen Li <sup>a, b, \*</sup>

<sup>a</sup> *State Key Laboratory of Silicate Materials for Architectures, School of Materials Science and Engineering, Wuhan University of Technology, Wuhan 430070, China*

<sup>b</sup> *State Key Laboratory of Advanced Technology for Materials Synthesis and Processing, Center of Smart Materials and Devices, Wuhan University of Technology, Wuhan 430070, China*

<sup>c</sup> *Key Laboratory for Liquid-Solid Structural Evolution and Processing of Materials (Ministry of Education), Shandong University, 17923 Jingshi Road, Jinan 250061, China*

<sup>d</sup> *State Key Lab of New Ceramics and Fine Processing, School of Materials Science and Engineering, Tsinghua University, Beijing, 100084, China*

\*Corresponding Author:

*E-mail address:*

[bwli@whut.edu.cn](mailto:bwli@whut.edu.cn) (B.-W. Li)

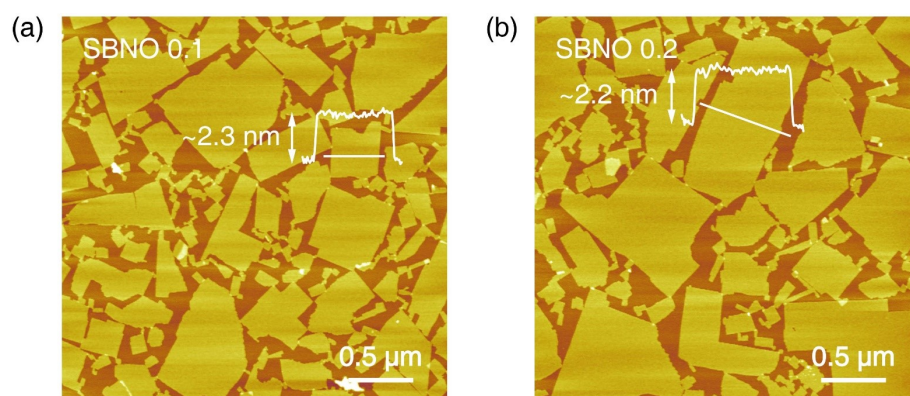

**Figure S1.** AFM images of (a)  $\text{Sr}_{1.9}\text{Bi}_{0.1}\text{Nb}_3\text{O}_{10}$  and (b)  $\text{Sr}_{1.8}\text{Bi}_{0.2}\text{Nb}_3\text{O}_{10}$  nanosheet, respectively. Inset: line profiles across individual nanosheet.

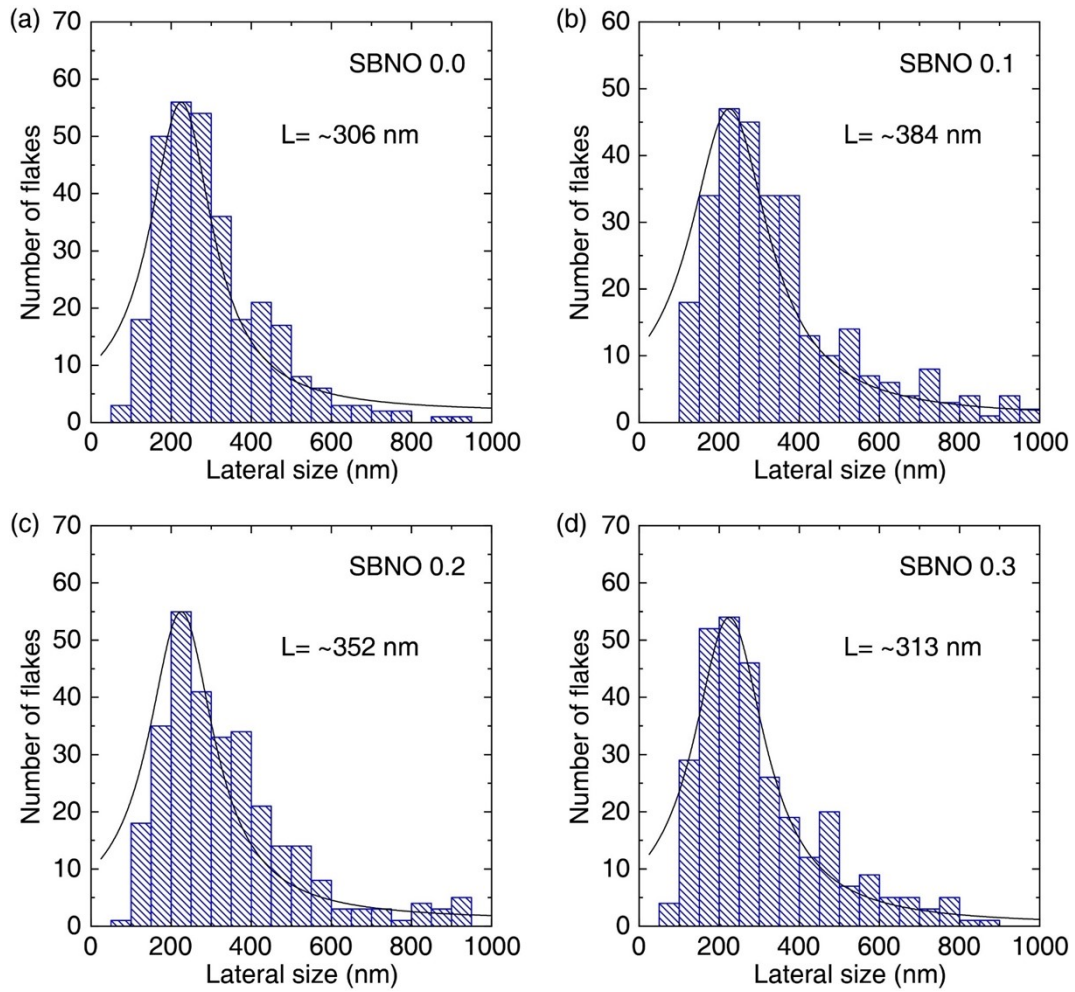

**Figure S2.** The lateral flake size distribution images of (a)  $\text{Sr}_2\text{Nb}_3\text{O}_{10}$ , (b)  $\text{Sr}_{1.9}\text{Bi}_{0.1}\text{Nb}_3\text{O}_{10}$ , (c)  $\text{Sr}_{1.8}\text{Bi}_{0.2}\text{Nb}_3\text{O}_{10}$ , and (d)  $\text{Sr}_{1.7}\text{Bi}_{0.3}\text{Nb}_3\text{O}_{10}$  nanosheets.

**Table S1.** The rheological parameters including viscosity, surface tension, density, and Z value for

$\text{Sr}_{2-x}\text{Bi}_x\text{Nb}_3\text{O}_{10}$  ( $x = 0.0-0.3$ ), graphene, and Ag ink.

|              | Viscosity (mPa·s) | Surface tension (mN/m) | Density (g/cm <sup>3</sup> ) | Z value |
|--------------|-------------------|------------------------|------------------------------|---------|
| SBNO 0.0 ink | 2.31              | 26.5                   | 0.895                        | 9.4     |
| SBNO 0.1 ink | 2.35              | 26.8                   | 0.895                        | 9.3     |
| SBNO 0.2 ink | 2.37              | 26.2                   | 0.895                        | 9.1     |
| SBNO 0.3 ink | 2.33              | 26.6                   | 0.895                        | 9.3     |
| Gr ink       | 11.3              | 33                     | 0.94                         | 2.2     |
| Ag ink       | 7.5               | 25                     | 1.0                          | 2.98    |

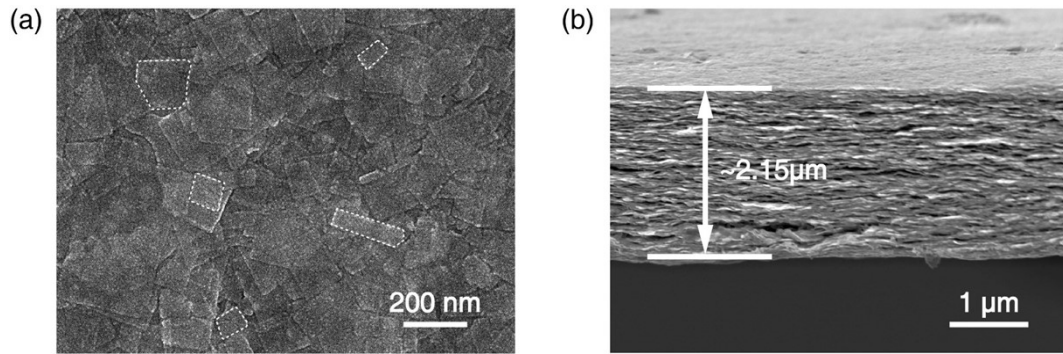

**Figure S3.** (a) Surface and (b) cross-sectional SEM images of inkjet-printed  $\text{Sr}_{1.7}\text{Bi}_{0.3}\text{Nb}_3\text{O}_{10}$  films on a quartz glass substrate.

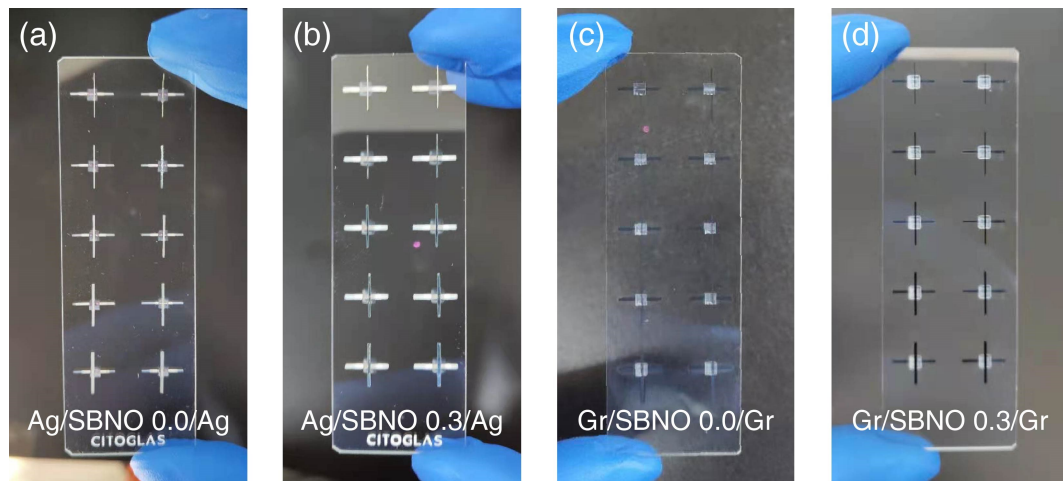

**Figure S4.** The optical photographs of inkjet-printed (a) Ag/SBNO 0.0/Ag, (b) Ag/SBNO 0.3/Ag, (c) Gr/SBNO 0.0/Gr, and (d) Gr/SBNO 0.3/Gr microcapacitors on a glass substrate.

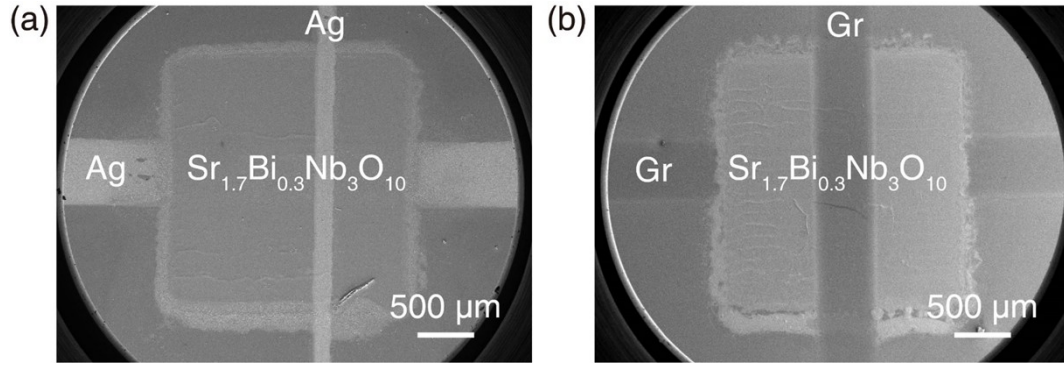

**Figure S5.** SEM images of inkjet-printed Ag/SBNO 0.3/Ag and Gr/SBNO 0.3/Gr microcapacitors on a glass substrate.

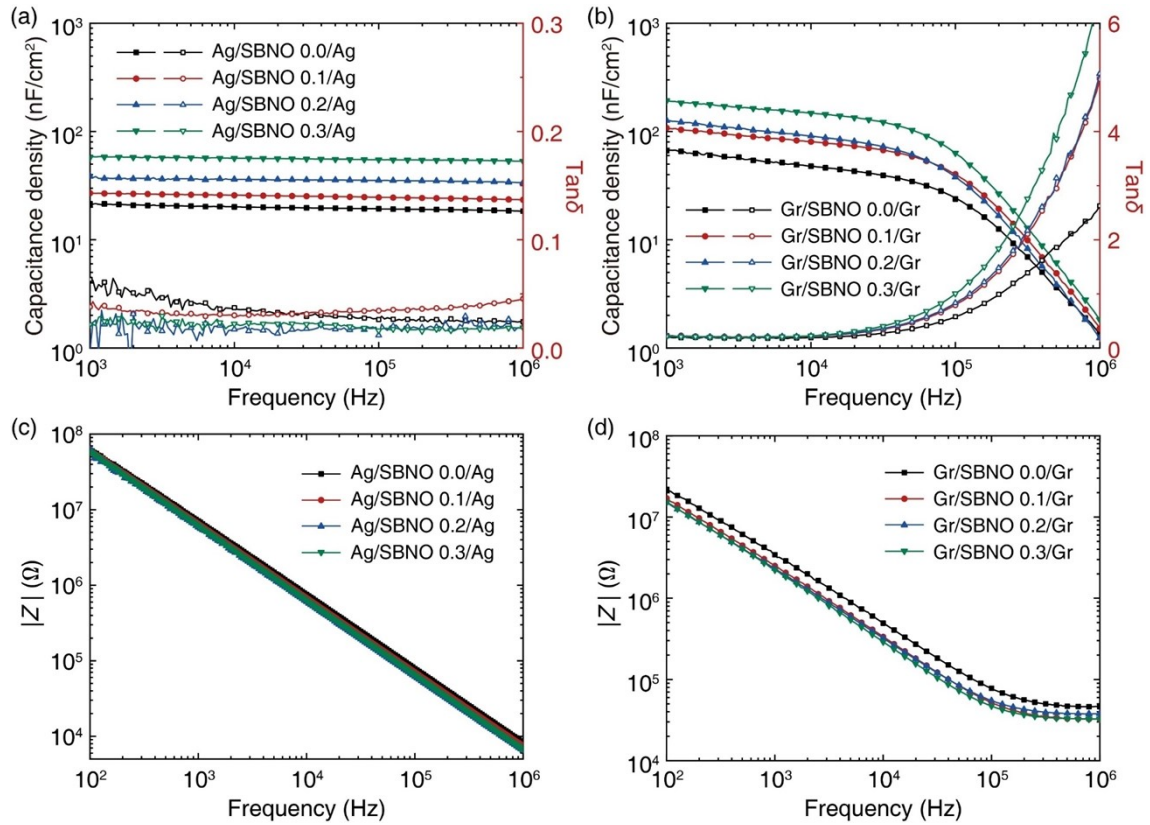

**Figure S6.** Frequency dependence of (a, b) capacitance density,  $\tan\delta$  and (c, d) impedance modulus values for inkjet-printed microcapacitors of (a, c)  $\text{Ag}_B/\text{Sr}_{2-x}\text{Bi}_x\text{Nb}_3\text{O}_{10}/\text{Ag}_T$  ( $x = 0.0-0.3$ ) and (b, d)  $\text{Gr}_B/\text{Sr}_{2-x}\text{Bi}_x\text{Nb}_3\text{O}_{10}/\text{Gr}_T$  ( $x = 0.0-0.3$ ), respectively.



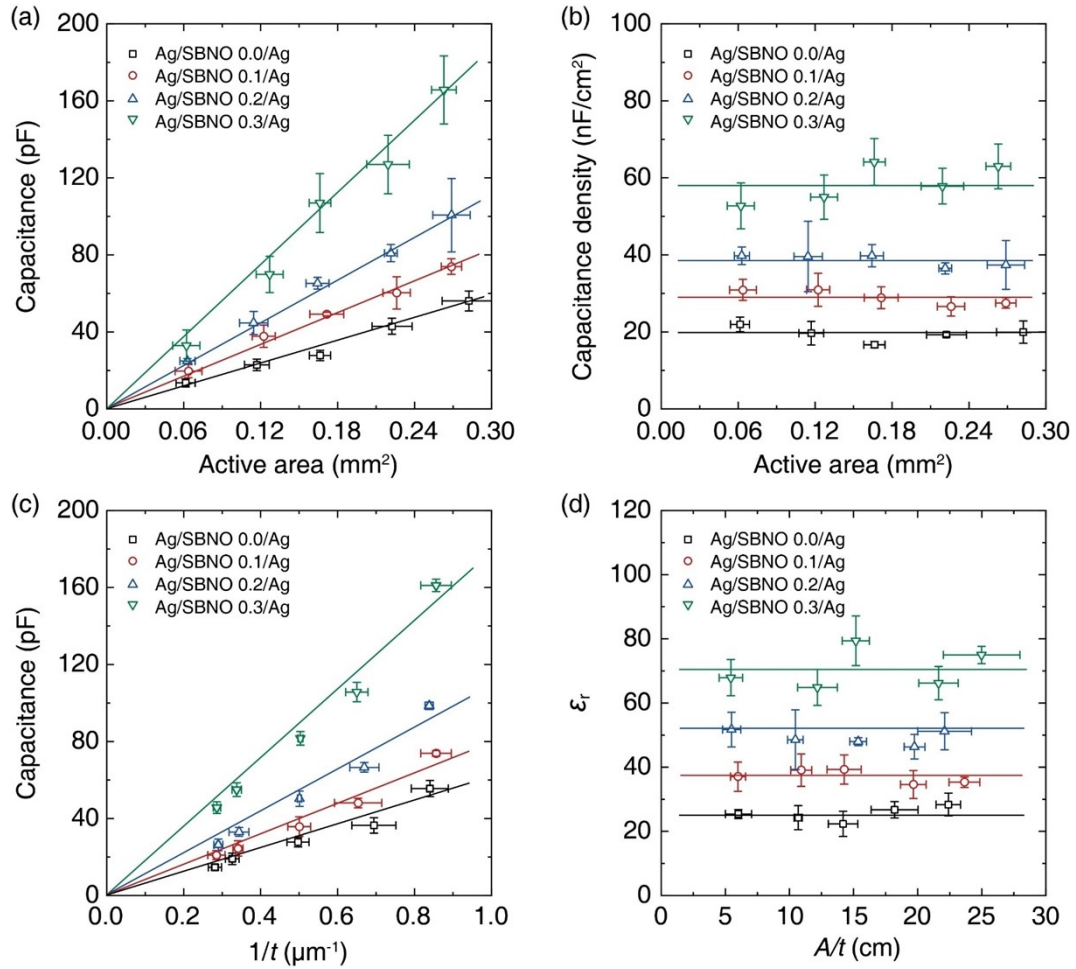

**Figure S7.** Dielectric performance of inkjet-printed  $\text{Ag}_B/\text{Sr}_{2-x}\text{Bi}_x\text{Nb}_3\text{O}_{10}/\text{Ag}_T$  ( $x = 0.0-0.3$ ) microcapacitors. Active area dependence of (a) capacitance and (b) capacitance density for inkjet-printed microcapacitors with a dielectric-layer thickness ( $t$ ) of  $\sim 1.2 \mu\text{m}$ . (c) The curve of capacitance as a function of reverse thickness for inkjet-printed microcapacitors with the active area ( $s$ ) of  $\sim 0.25 \text{mm}^2$ . (d) The curve of relative permittivity as a function of the ratio of active area to thickness.

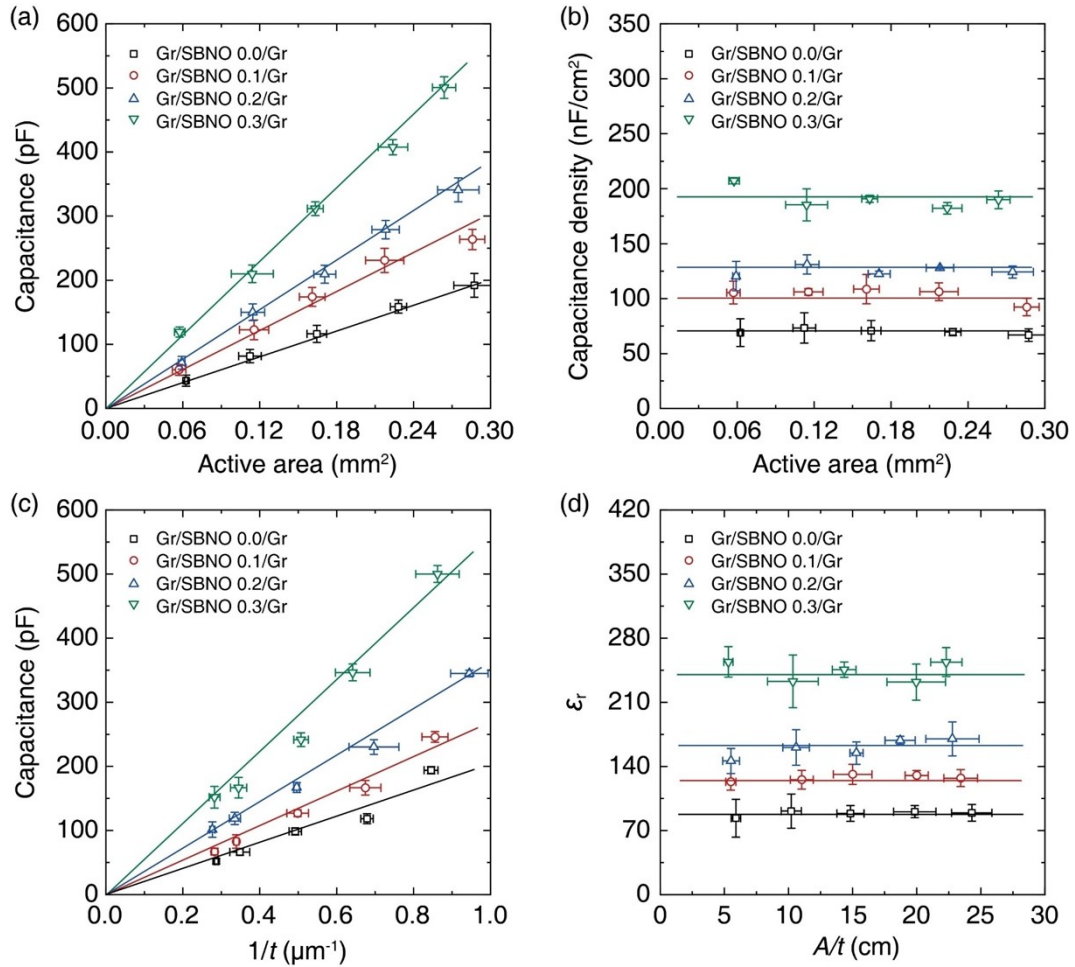

**Figure S8.** Dielectric performance of inkjet-printed  $\text{Gr}_B/\text{Sr}_{2-x}\text{Bi}_x\text{Nb}_3\text{O}_{10}/\text{Gr}_T$  ( $x = 0.0-0.3$ ) microcapacitors. Active area dependence of (a) capacitance and (b) capacitance density for inkjet-printed microcapacitors with a dielectric-layer thickness ( $t$ ) of  $\sim 1.2 \mu\text{m}$ . (c) The curve of capacitance as a function of reverse thickness for inkjet-printed microcapacitors with the active area ( $s$ ) of  $\sim 0.25 \text{ mm}^2$ . (d) The curve of relative permittivity as a function of the ratio of active area to thickness.

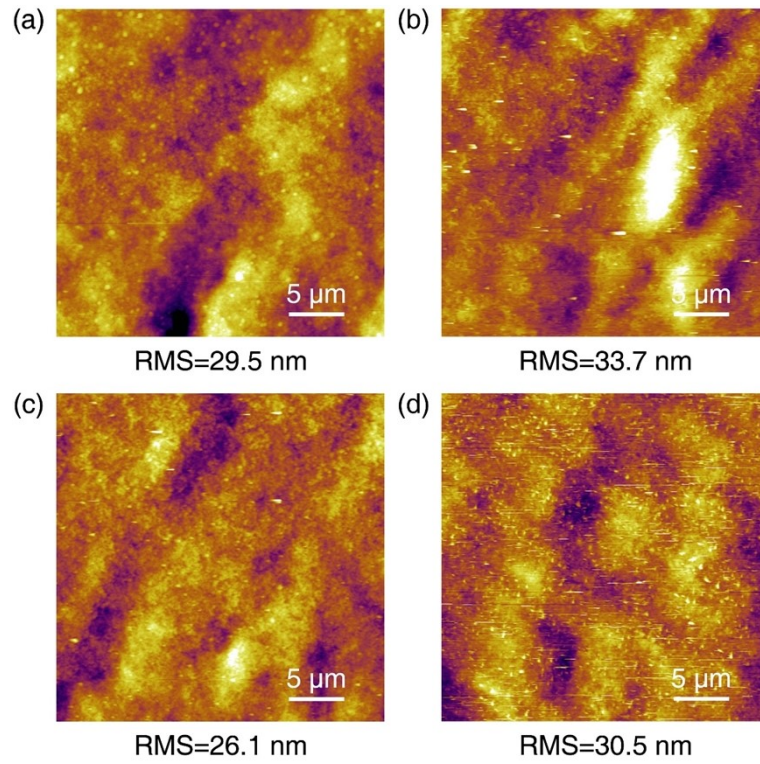

**Figure S9.** AFM images of inkjet-printed (a)  $\text{Ag}_B/\text{Sr}_2\text{Nb}_3\text{O}_{10}/\text{Ag}_T$ , (b)  $\text{Ag}_B/\text{Sr}_{1.9}\text{Bi}_{0.1}\text{Nb}_3\text{O}_{10}/\text{Ag}_T$ , (c)  $\text{Ag}_B/\text{Sr}_{1.8}\text{Bi}_{0.2}\text{Nb}_3\text{O}_{10}/\text{Ag}_T$ , and (d)  $\text{Ag}_B/\text{Sr}_{1.7}\text{Bi}_{0.3}\text{Nb}_3\text{O}_{10}/\text{Ag}_T$  microcapacitors on a glass substrate.



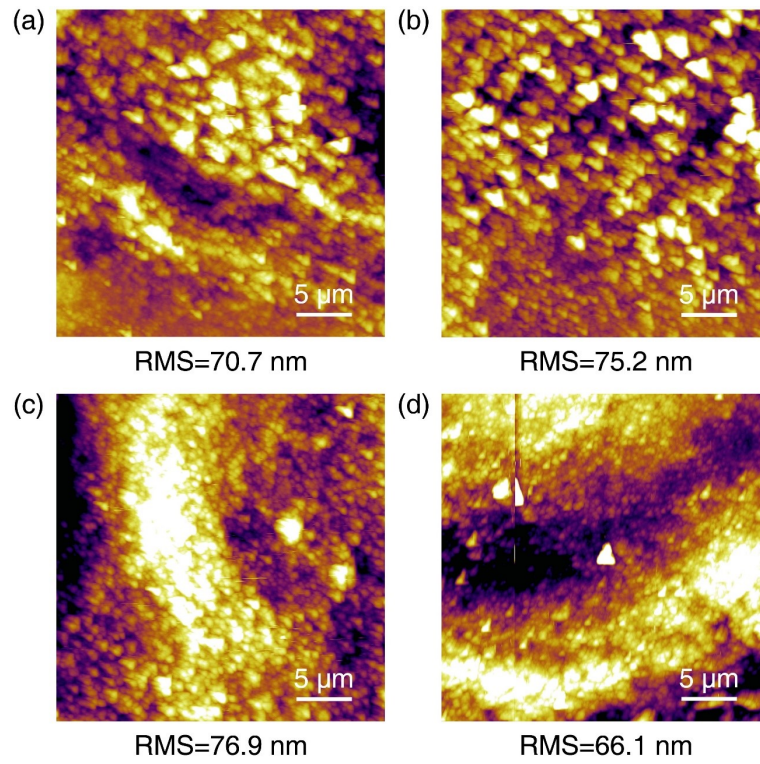

**Figure S10.** AFM images of inkjet-printed (a)  $\text{Gr}_B/\text{Sr}_2\text{Nb}_3\text{O}_{10}/\text{Gr}_T$ , (b)  $\text{Gr}_B/\text{Sr}_{1.9}\text{Bi}_{0.1}\text{Nb}_3\text{O}_{10}/\text{Gr}_T$ , (c)  $\text{Gr}_B/\text{Sr}_{1.8}\text{Bi}_{0.2}\text{Nb}_3\text{O}_{10}/\text{Gr}_T$ , and (d)  $\text{Gr}_B/\text{Sr}_{1.7}\text{Bi}_{0.3}\text{Nb}_3\text{O}_{10}/\text{Gr}_T$  microcapacitors on a glass substrate.

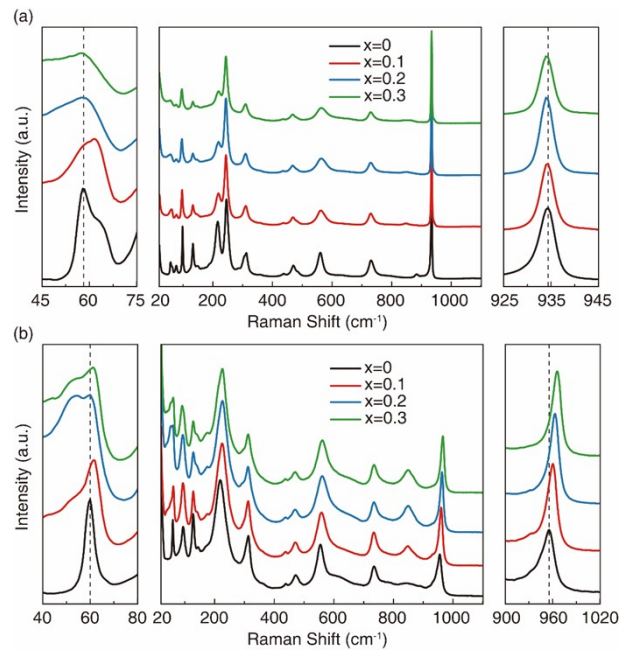

**Figure S11.** Raman spectra of (a)  $\text{K Sr}_{2-x} \text{Bi}_x \text{Nb}_3 \text{O}_{10}$  and (b)  $\text{H Sr}_{2-x} \text{Bi}_x \text{Nb}_3 \text{O}_{10} \cdot n \text{H}_2 \text{O}$  ( $x = 0, 0.1, 0.2,$  and  $0.3$ ) powders.

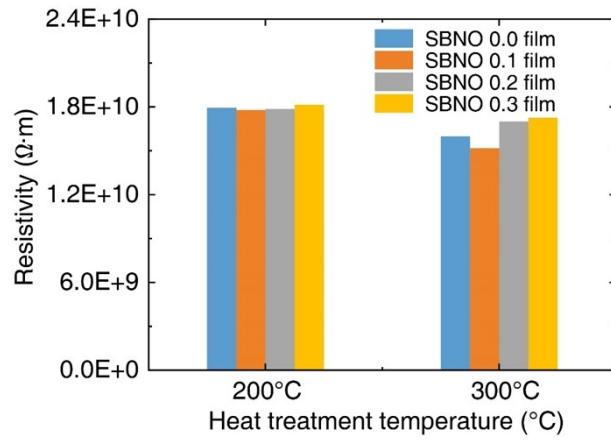

**Figure S12.** The surface resistivity of inkjet-printed  $Sr_{2-x}Bi_xNb_3O_{10}$  ( $x = 0.0-0.3$ ) film at different heat treatment temperatures.

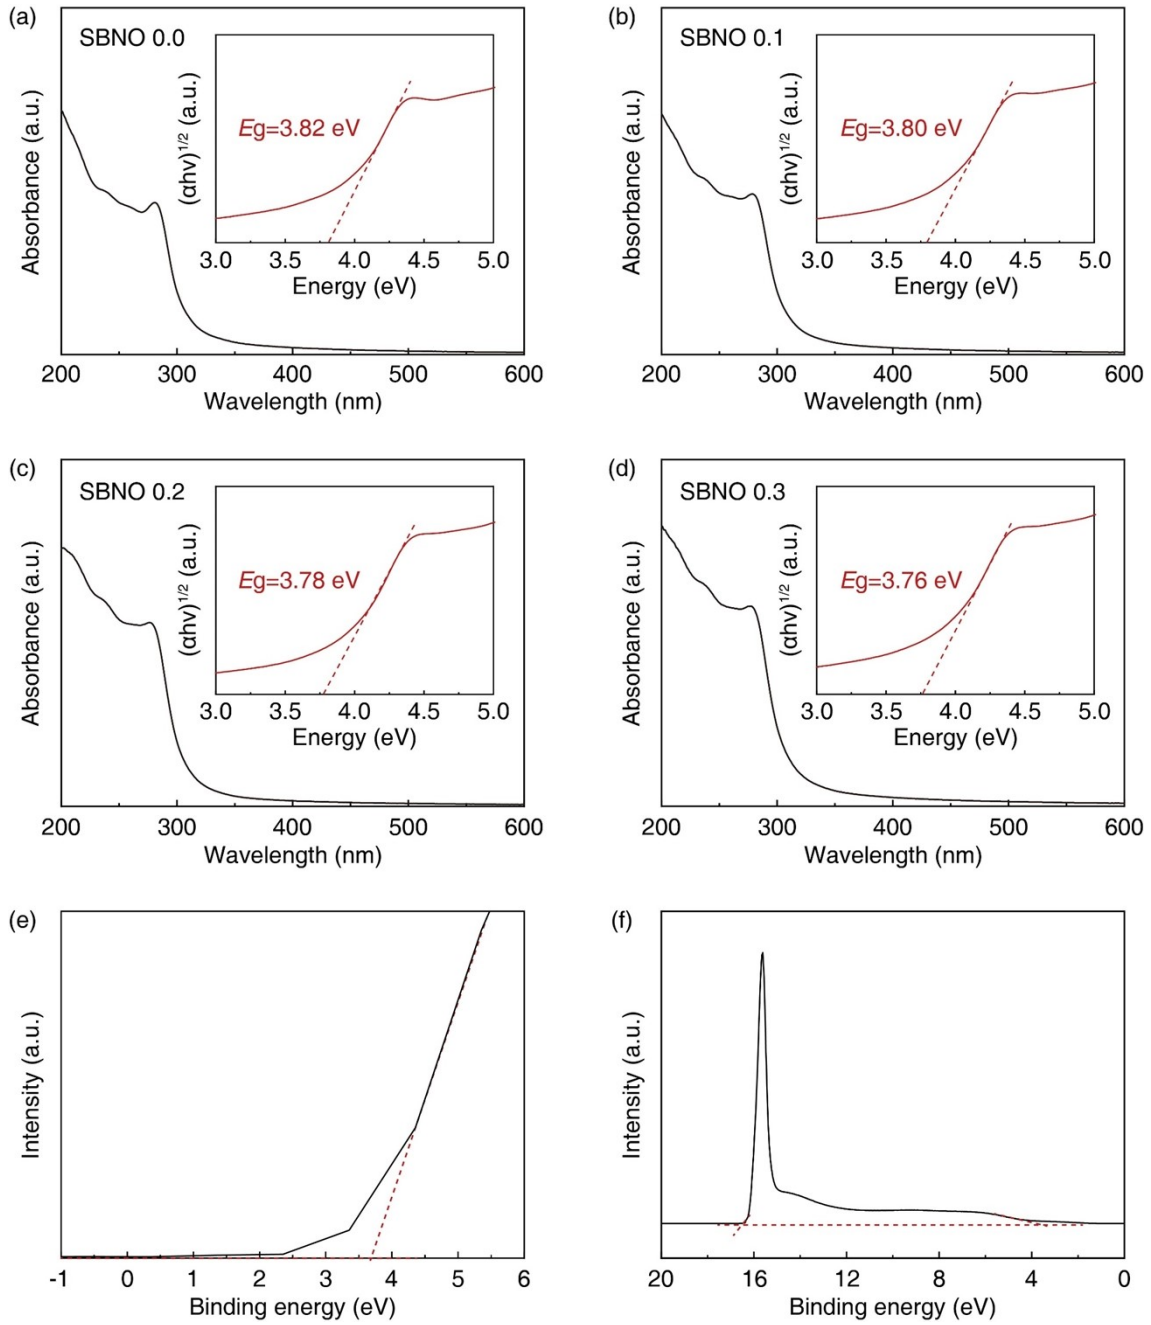

**Figure S13.** (a-d) UV-vis absorption spectra and the corresponding Tauc curve of  $\text{Sr}_{2-x}\text{Bi}_x\text{Nb}_3\text{O}_{10}$  ( $x = 0.0-0.3$ ) film printed on the quartz substrate. (e) XPS valence bands and (f) UPS spectra as the estimation of work functions for  $\text{Sr}_2\text{Nb}_3\text{O}_{10}$  film printed on the quartz substrate.

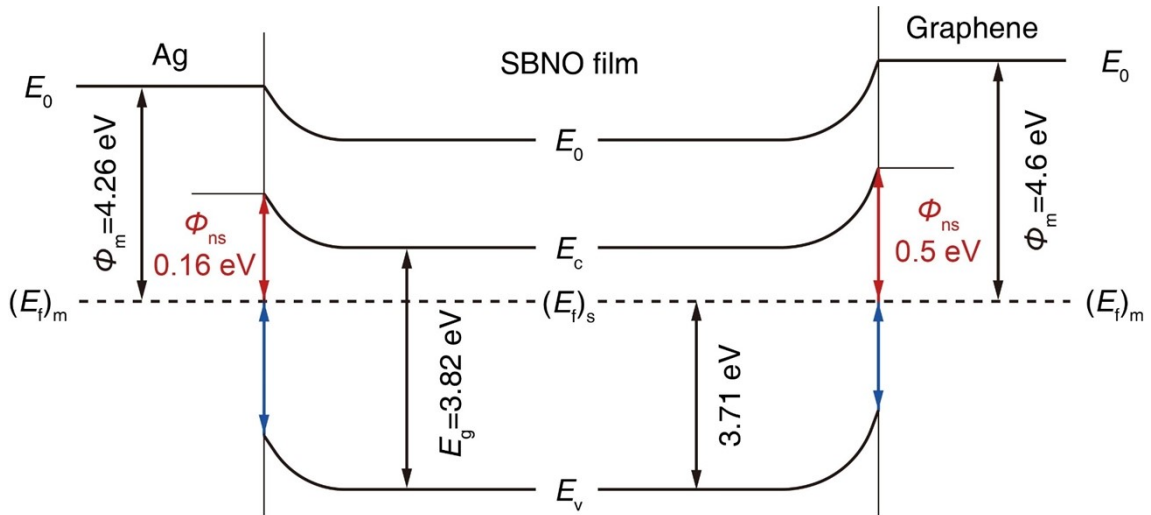

**Figure S14.** Energy band diagrams at the (a) Ag/Sr<sub>2</sub>Nb<sub>3</sub>O<sub>10</sub> film and (b) graphene/Sr<sub>2</sub>Nb<sub>3</sub>O<sub>10</sub> film interfaces, respectively.

**Table S2.** Lateral size statistics of Sr<sub>2-x</sub>Bi<sub>x</sub>Nb<sub>3</sub>O<sub>10</sub> ( $x = 0.0-0.3$ ) perovskite nanosheets

| Nanosheets                              | Sr <sub>2</sub> Nb <sub>3</sub> O <sub>10</sub> | Sr <sub>1.9</sub> Bi <sub>0.1</sub> Nb <sub>3</sub> O <sub>10</sub> | Sr <sub>1.8</sub> Bi <sub>0.2</sub> Nb <sub>3</sub> O <sub>10</sub> | Sr <sub>1.7</sub> Bi <sub>0.3</sub> Nb <sub>3</sub> O <sub>10</sub> |
|-----------------------------------------|-------------------------------------------------|---------------------------------------------------------------------|---------------------------------------------------------------------|---------------------------------------------------------------------|
| Percentage of lateral size below 400 nm | 78.3%                                           | 70.7%                                                               | 72.3%                                                               | 76.7%                                                               |



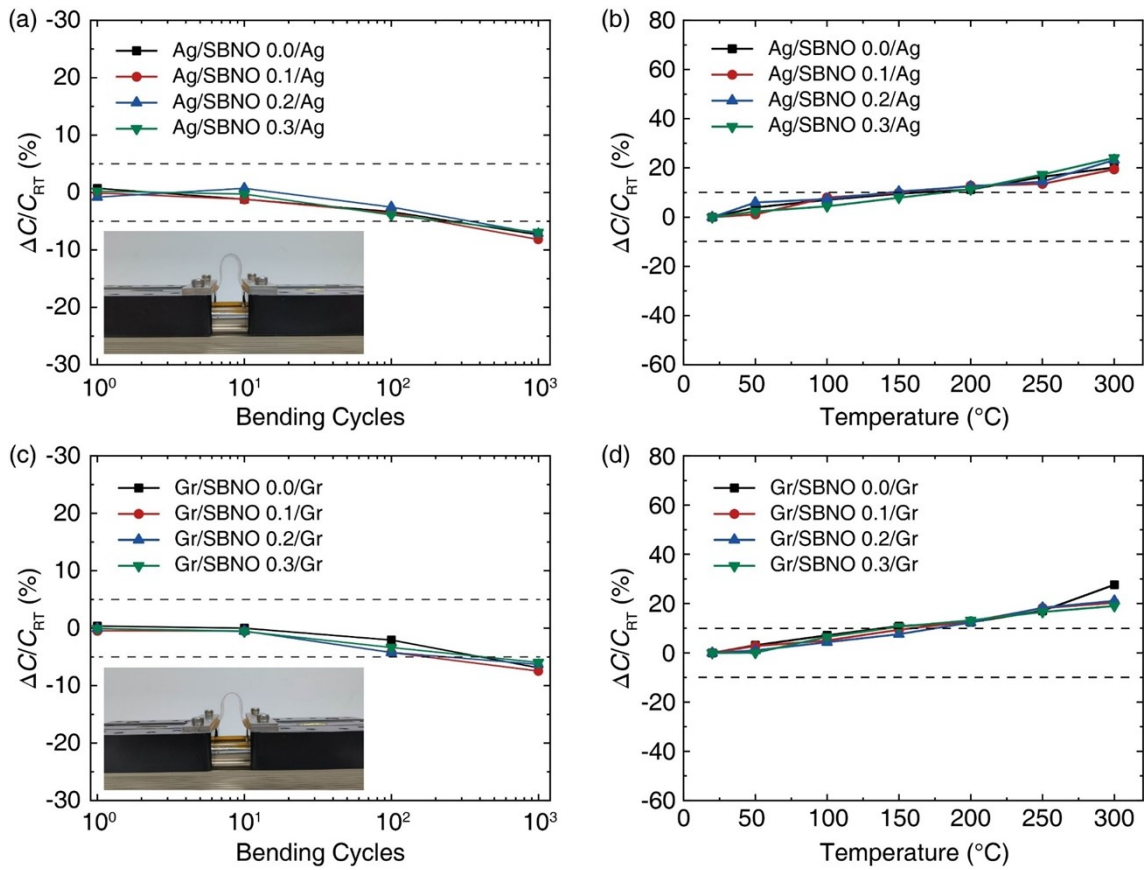

**Figure S15.** Electrical performance of inkjet-printed microcapacitors. Variation of capacitance as a function of bending cycles for inkjet-printed (a)  $\text{Ag}_B/\text{Sr}_{2-x}\text{Bi}_x\text{Nb}_3\text{O}_{10}/\text{Ag}_T$  ( $x = 0.0-0.3$ ) and (c)  $\text{Gr}_B/\text{Sr}_{2-x}\text{Bi}_x\text{Nb}_3\text{O}_{10}/\text{Gr}_T$  ( $x = 0.0-0.3$ ) microcapacitors, respectively. Variation of capacitance as a function of temperature for inkjet-printed (b)  $\text{Ag}_B/\text{Sr}_{2-x}\text{Bi}_x\text{Nb}_3\text{O}_{10}/\text{Ag}_T$  ( $x = 0.0-0.3$ ) and (d)  $\text{Gr}_B/\text{Sr}_{2-x}\text{Bi}_x\text{Nb}_3\text{O}_{10}/\text{Gr}_T$  ( $x = 0.0-0.3$ ) microcapacitors, respectively.

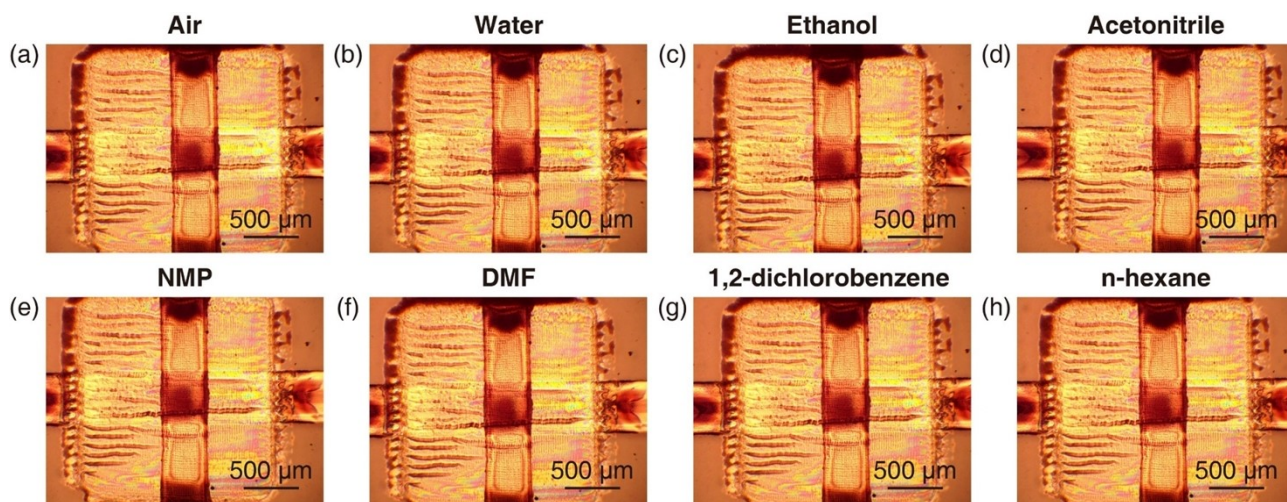

**Figure S16.** The optical photographs of  $\text{Ag}_B/\text{Sr}_{1.7}\text{Bi}_{0.3}\text{Nb}_3\text{O}_{10}/\text{Ag}_T$  microcapacitors treated in (a) air, (b) water, (c) ethanol, (d) acetonitrile, (e) NMP, (f) DMF, (g) 1,2-dichlorobenzene, and (h) n-hexane.

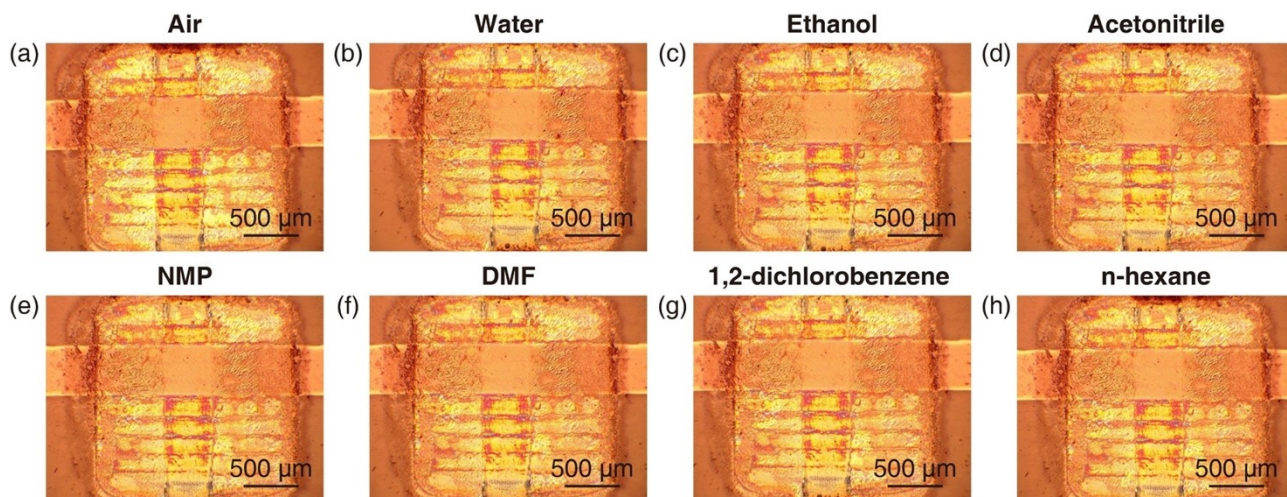

**Figure S17.** The optical photographs of  $\text{Gr}_B/\text{Sr}_{1.7}\text{Bi}_{0.3}\text{Nb}_3\text{O}_{10}/\text{Gr}_T$  microcapacitors treated in (a) air, (b) water, (c) ethanol, (d) acetonitrile, (e) NMP, (f) DMF, (g) 1,2-dichlorobenzene, and (h) n-hexane.

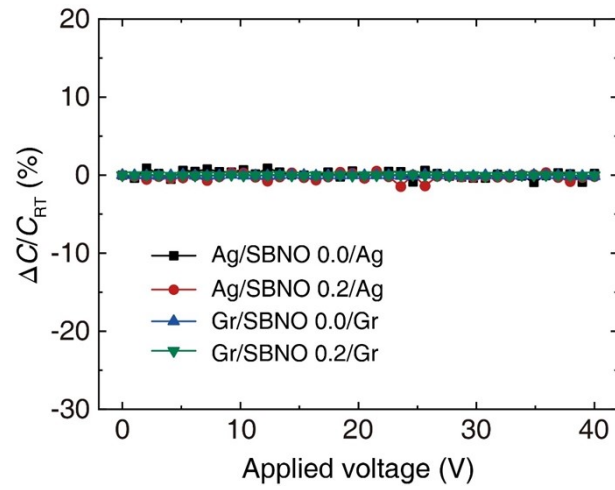

**Figure S18.** Electric field dependence of the capacitance variation for inkjet-printed  $\text{Ag}_B/\text{Sr}_{2-x}\text{Bi}_x\text{Nb}_3\text{O}_{10}/\text{Ag}_T$  ( $x = 0.0, 0.2$ ) and  $\text{Gr}_B/\text{Sr}_{2-x}\text{Bi}_x\text{Nb}_3\text{O}_{10}/\text{Gr}_T$  ( $x = 0.0, 0.2$ ) microcapacitors.

**Table S3.** Physical and chemical properties of different types of solvents<sup>1-3</sup>.

| Solvent      | Polarity      | Polarity index | Dielectric constant | Molecular weight (g/mol) |
|--------------|---------------|----------------|---------------------|--------------------------|
| Water        | Polar Protic  | 10.2           | 80.1                | 18.01524                 |
| Ethanol      | Polar Protic  | 4.3            | 25.3                | 46.06844                 |
| Acetonitrile | Polar Aprotic | 6.2            | 36.64               | 41.052                   |
| NMP          | Polar Aprotic | 6.7            | 32.55               | 99.13                    |
| DMF          | Polar Aprotic | 6.4            | 38.25               | 73.095                   |
| DCB          | Non polar     | 2.7            | 9.32                | 147.01                   |
| Hexane       | Non polar     | 0.06           | 1.89                | 86.175                   |

**Table S4.** The yield and reproducibility of inkjet-printed microcapacitors.

| Inkjet-printed microcapacitors                                             | Sample quantity | Working   | Yield and Reproducibility |
|----------------------------------------------------------------------------|-----------------|-----------|---------------------------|
| Ag/Sr <sub>2</sub> Nb <sub>3</sub> O <sub>10</sub> /Ag                     | 15              | 12        | 80%                       |
| Ag/Sr <sub>1.9</sub> Bi <sub>0.1</sub> Nb <sub>3</sub> O <sub>10</sub> /Ag | 15              | 14        | 93.3%                     |
| Ag/Sr <sub>1.8</sub> Bi <sub>0.2</sub> Nb <sub>3</sub> O <sub>10</sub> /Ag | 15              | 13        | 86.7%                     |
| Ag/Sr <sub>1.7</sub> Bi <sub>0.3</sub> Nb <sub>3</sub> O <sub>10</sub> /Ag | 15              | 13        | 86.7%                     |
| Gr/Sr <sub>2</sub> Nb <sub>3</sub> O <sub>10</sub> /Gr                     | 15              | 9         | 60%                       |
| Gr/Sr <sub>1.9</sub> Bi <sub>0.1</sub> Nb <sub>3</sub> O <sub>10</sub> /Gr | 15              | 10        | 66.7%                     |
| Gr/Sr <sub>1.8</sub> Bi <sub>0.2</sub> Nb <sub>3</sub> O <sub>10</sub> /Gr | 15              | 11        | 73.3%                     |
| Gr/Sr <sub>1.7</sub> Bi <sub>0.3</sub> Nb <sub>3</sub> O <sub>10</sub> /Gr | 15              | 10        | 66.7%                     |
| <b>Total</b>                                                               | <b>120</b>      | <b>92</b> | <b>76.7%</b>              |

**References:**

1. C. M. Hansen, *Hansen solubility parameters: a user's handbook*, CRC Press, 2007.
2. D. R. Lide, *CRC handbook of chemistry and physics*, CRC Press, 2004.
3. C. L. Yaws, *Thermophysical properties of chemicals and hydrocarbons*, William Andrew, 2008.
